# Supplementary material for: Optimization of Extraction Solvent and Fast Blue BB Assay for Comparative Analysis of Antioxidant Phenolics from Cucumis melo L
Source: MDPI journal article supplement (doi:10.3390/plants10071379), 2021-07-06
Supplement: s1 [file s1]

# **Optimization of Extraction Solvent and Fast Blue BB Assay for Comparative Analysis of Antioxidant Phenolics From *Cucumis melo* L.**

Varsha Ravindranath<sup>1,2</sup>, Jashbir Singh<sup>1</sup>, Guddadarangavvanahally K. Jayaprakasha<sup>1</sup>, and Bhimanagouda S. Patil<sup>1,2\*</sup>

1 Vegetable & Fruit Improvement Center, Department of Horticultural Sciences, Texas A&M University, 1500 Research Parkway, Suite A120, College Station, Texas 77845-2119, United States; varsharavindranath@tamu.edu; singh2014@tamu.edu

2 Department of Food Science and Technology, Texas A&M University, College Station, TX, 77845, USA ; b-patil@tamu.edu

\*Corresponding author

Bhimanagouda S. Patil

Tel.: +1 979 862 4521; fax: +1 979 862 4522

e-mail: b-patil@tamu.edu

**Table S1.** Solvents (22 combinations) for optimization of extraction solvents.

| SOLVENT ID | SOLVENT COMBINATION                    |
|------------|----------------------------------------|
| S1         | Water                                  |
| S2         | Methanol : water : formic acid 50:45:5 |
| S3         | Methanol : water : formic acid 50:48:2 |
| S4         | Methanol : water : formic acid 80:15:5 |
| S5         | Methanol : water : formic acid 80:18:2 |
| S6         | Methanol : water 50:50                 |
| S7         | Methanol : water 80:20                 |
| S8         | Methanol                               |
| S9         | Ethanol : water : formic acid 50:45:5  |
| S10        | Ethanol : water : formic acid 50:48:2  |
| S11        | Ethanol : water : formic acid 80:15:5  |
| S12        | Ethanol : water : formic acid 80:18:2  |
| S13        | Ethanol : water 50:50                  |
| S14        | Ethanol : water 80:20                  |
| S15        | Ethanol                                |
| S16        | Acetone : water : formic acid 50:45:5  |
| S17        | Acetone : water : formic acid 50:48:2  |
| S18        | Acetone : water : formic acid 80:15:5  |
| S19        | Acetone : water : formic acid 80:18:2  |
| S20        | Acetone : water 50:50                  |
| S21        | Acetone : water 80:20                  |
| S22        | Acetone                                |

Sample extracts obtained from 22 solvent combinations were used to evaluate total phenolic content (Folin Ciocalteu assay and optimized Fast Blue assay), and examine antioxidant activities (DPPH and ABTS).

**Table S2.** Juices used for optimization and validation of the FB assay.

| JUICE ID | JUICE SAMPLE                         |
|----------|--------------------------------------|
| J1       | White Grape Juice (Welch's)          |
| J2       | White Grape Juice (H-E-B)            |
| J3       | Apple Juice (Old Orchard)            |
| J4       | Apple Juice (Feeding America)        |
| J5       | Pineapple Juice (H-E-B)              |
| J6       | Pineapple Juice (Central Market)     |
| J7       | Grapefruit Juice (Ocean Spray)       |
| J8       | Grapefruit Juice (H-E-B)             |
| J9       | Organic Grape Juice (H-E-B)          |
| J10      | Concord Grape Juice (Central Market) |
| J11      | Cranberry Juice (Ocean Spray)        |
| J12      | Cranberry Juice (Lakewood Organic)   |
| J13      | Prune Juice (Sunsweet Amazin)        |
| J14      | 100% Prune Juice (H-E-B)             |
| J15      | Pomegranate Juice (Langers)          |
| J16      | Pomegranate Juice (Central Market)   |

Juice ID and total phenolic contents of the juices are represented in Table 2 of the manuscript.
